# Supplementary material for: Spin transition in a triazine-based Fe(ii) complex: variable-temperature structural, thermal, magnetic and spectroscopic studies
Source: Royal Society of Chemistry journal article supplement (doi:10.1039/b602903e), 2006-01-01

## Spin transition in a triazine-based Fe(II) complex: variable-temperature structural, thermal, magnetic and spectroscopic studies

Manuel Quesada,<sup>a</sup> Maria Monrabal,<sup>a</sup> Guillem Aromí,<sup>\*b</sup> Víctor A. de la Peña-O'Shea,<sup>b</sup> Martí Gich,<sup>c</sup> Elies Molins,<sup>c</sup> Olivier Roubeau,<sup>d</sup> Simon J. Teat,<sup>e</sup> Elisabeth J. MacLean,<sup>e</sup> Patrick Gamez,<sup>\*a</sup> and Jan Reedijk<sup>a</sup>

### Supplementary Material

**Figure S1.** Representation of the molecular structure of  $[\text{Fe}(\text{dpyatriz})_2(\text{SCN})_2]$  (**2**), emphasizing the  $[\text{S}\cdots\text{S}]$  interactions between individual molecules, leading to “inorganic wires” protected by an organic shell of dpyatriz ligands.

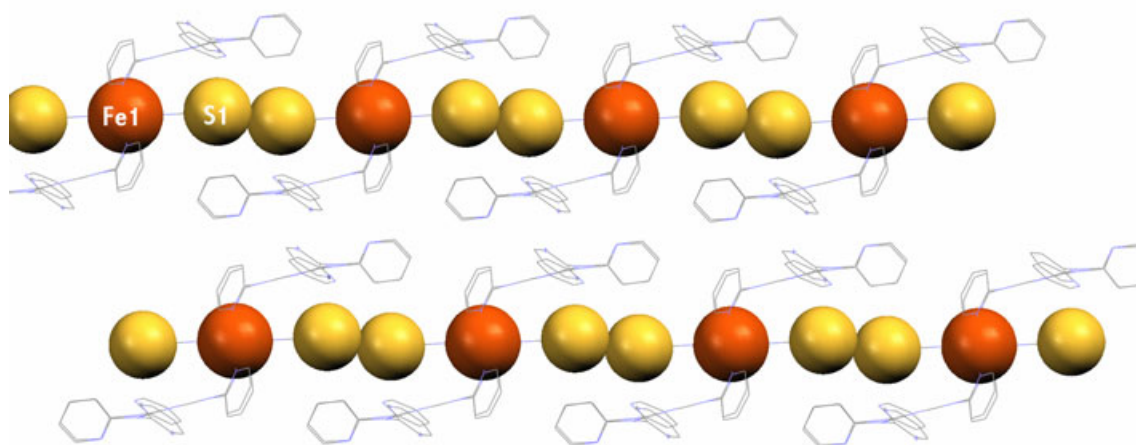

**Figure S2.** Infrared spectra of a ground sample of  $[\text{Fe}(\text{dpyatriz})_2(\text{SCN})_2]$  (**2**) and 41K (black) and 300K (red), emphasizing the differences and similarities between the HS and LS forms of the complex.

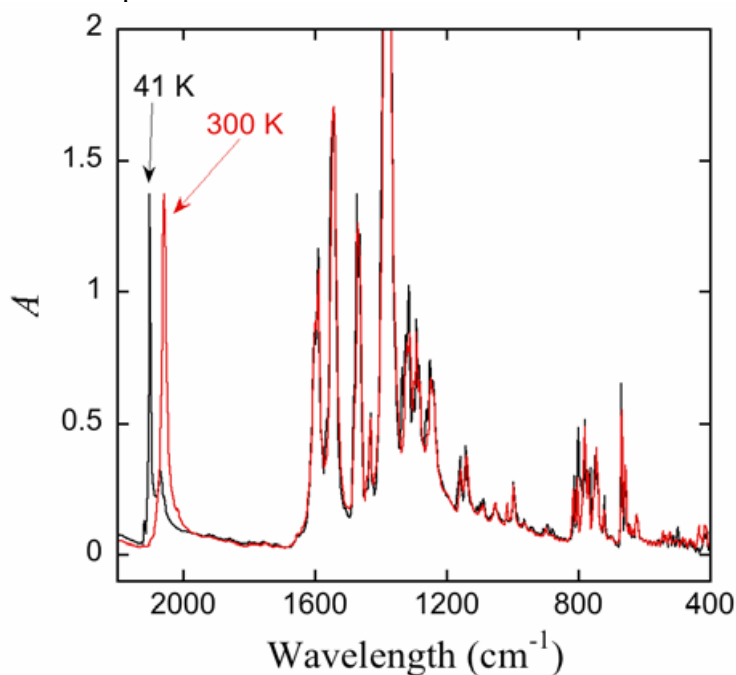

**Figure S3.** Isofield magnetization vs field curves of a polycrystalline (black) and ground (blue) sample of  $[\text{Fe}(\text{dpyatriz})_2(\text{SCN})_2]$  (**2**) at 2K, allowing to estimate the residual fraction of the HS form of the complex at this temperature in ca. 3.4 and 6.5 %, respectively. The solid lines are fits to the Brillouin equation.

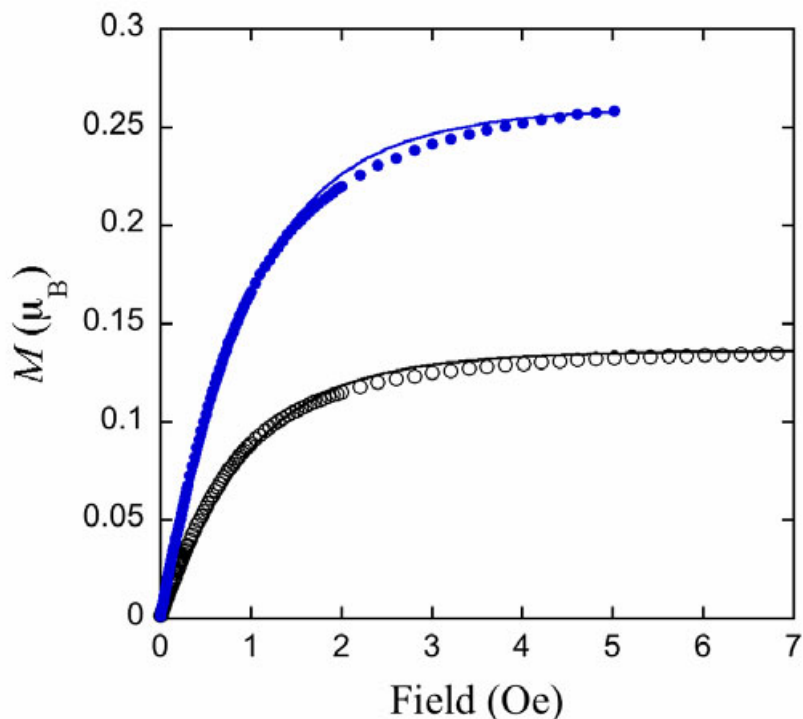

**Figure S4.** Relative area of the HS (blue squares) versus LS (red circles) forms of  $[\text{Fe}(\text{dpyatriz})_2(\text{SCN})_2]$  (**2**) at different temperatures, as revealed by Mössbauer spectroscopy, showing a gradual and ca. 70 % complete spin transition.

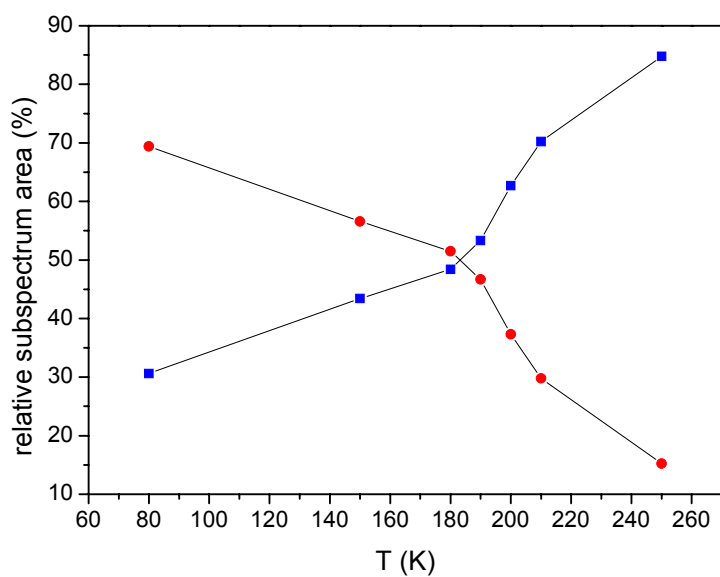

**Figure S5.** Plot of the heat capacity at constant pressure,  $C_p$ , of  $[\text{Fe}(\text{dpyatriz})_2(\text{SCN})_2]$  (**2**) versus  $T$  as derived from Differential Scanning Calorimetry. A heat capacity anomaly is observed, centered near 200K, the temperature where the spin transition of **2** takes place.

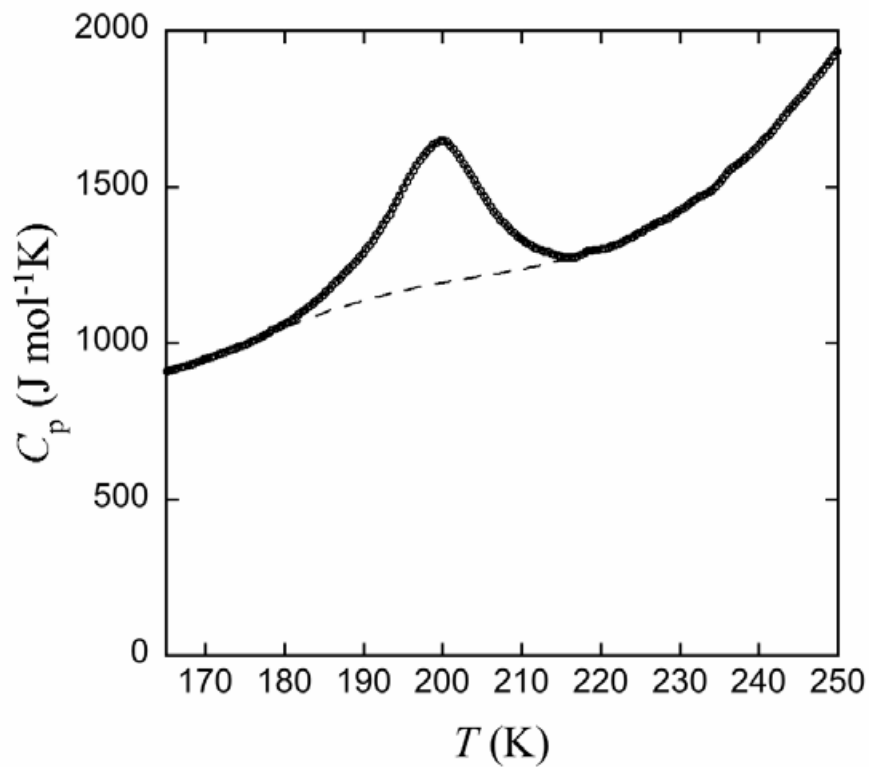

Supplement: b602903e.pdf [file b602903e.pdf]
